# Supplementary material for: A Plasma Proteomic Approach in Rett Syndrome: Classical versus Preserved Speech Variant
Source: Hindawi journal article supplement (doi:10.1155/2013/438653), 2013-01-01
Supplement: f1 [file 438653.f1.pdf]

Table 4: Protein variations as derived from each examined RTT sister vs. healthy controls comparative analyses.

| Comparative groups                                          | Plasma proteome differences       |          |                                        |            |
|-------------------------------------------------------------|-----------------------------------|----------|----------------------------------------|------------|
|                                                             | Quantitative variations           |          | Qualitative variations                 |            |
|                                                             | Decrease                          | Increase | Disappearance                          | Appearance |
| #1 Classical RTT <sup>(1)</sup> vs Controls <sup>(10)</sup> | ↓AMBP, ↓FIBB, ↓IGHG2, ↓TRFE, ↓CO3 | N.D.     | -IGJ                                   | N.D.       |
| #2 Classical RTT <sup>(1)</sup> vs Controls <sup>(10)</sup> | ↓FIBB, ↓ALBU, ↓TRFE, ↓CO3         | ↑CLUS    | -HBB, -A1AT, -TTHY                     | N.D.       |
| #3 PSV-RTT <sup>(1)</sup> vs Controls <sup>(10)</sup>       | ↓HBB, ↓IGHG2, ↓TRFE, ↓CO3         | ↑TTHY    | -ALBU, -IGJ, -HBB, -A1AT               | N.D.       |
| #4 PSV-RTT <sup>(1)</sup> vs Controls <sup>(10)</sup>       | ↓IGHG2, ↓TRFE                     | N.D.     | -AMBP, -CLUS, -ALBU, -IGJ, -A1AT, -CO3 | N.D.       |

↓ protein decrease; ↑ protein increase; - protein disappear; + protein appear; N.D. protein not detectable.

A1AT, Alpha-1-antitrypsin; AMBP, Alpha-1-microglobulin; ALBU, Albumin; CLUS, Clusterin; CO3, Complement C3; FIBB, Fibrinogen beta-chain; HBB, Hemoglobin subunit beta; HPT, Haptoglobin; IGHG2, Immunoglobulin gamma-2 chain C region; IGJ, Immunoglobulin J chain; TRFE, Serum transferrin; TTHY, Transthyretin. Numbers in the parentheses indicated the number of patients or subjects who are compared.
